# Supplementary figures and images for: Mosaic loss of Y chromosome in monocytes is associated with lower survival after transcatheter aortic valve replacement
Source: PubMed Central journal article supplement — Eur Heart J. 2023 Mar 18;44(21):1943–52. doi: 10.1093/eurheartj/ehad093 (PMC10232276; doi:10.1093/eurheartj/ehad093), 2023-03-18

# Supplementary Figure 1

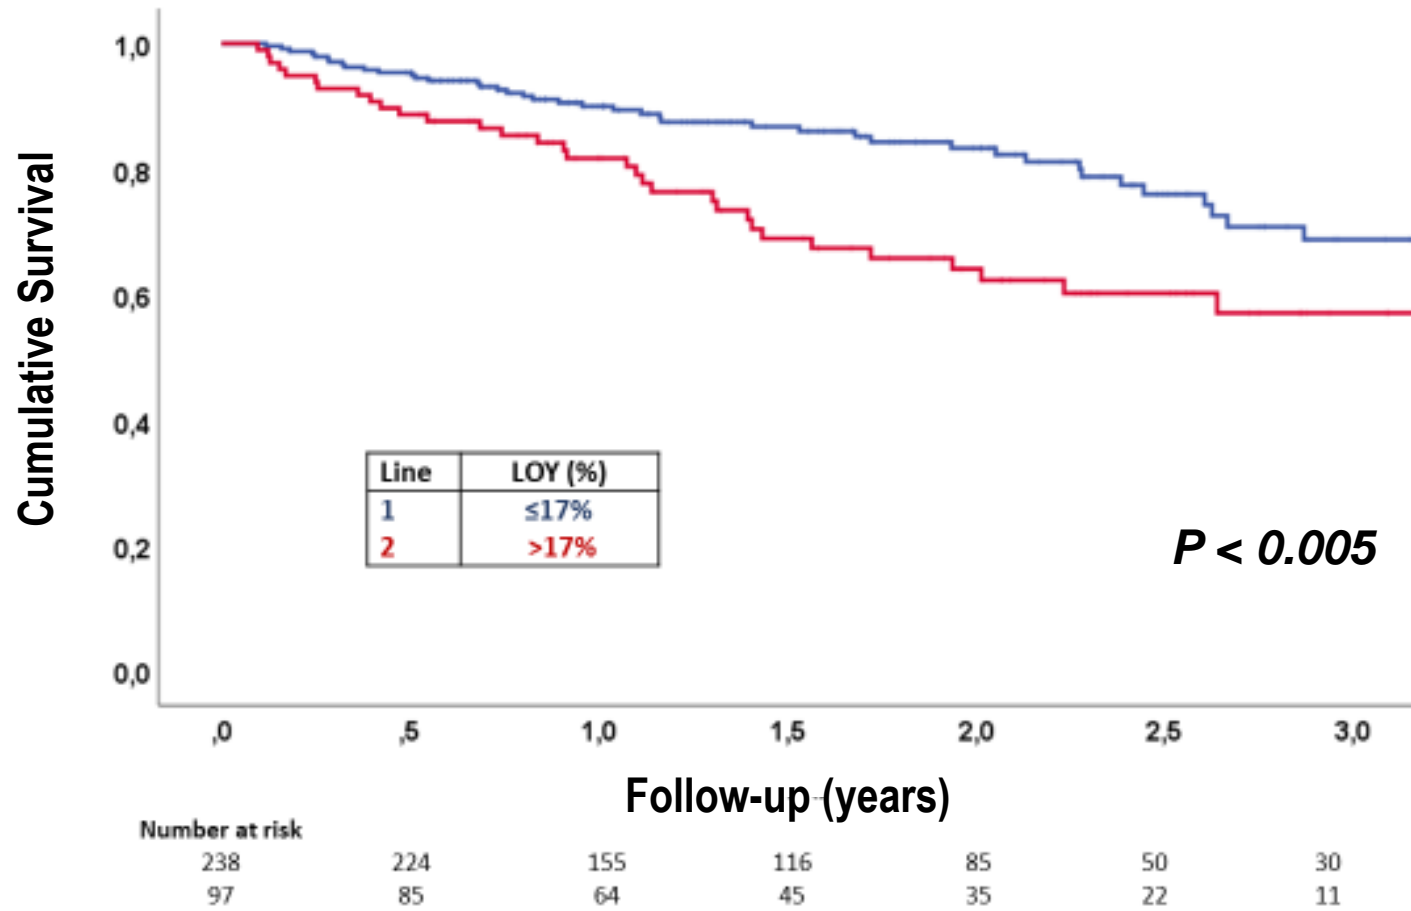

Supplement: ehad093_supplementary_data.pdf [file ehad093_supplementary_data.pdf]
